# Supplementary material
Source: PubMed Central journal article supplement (PMC10354141)
Supplement: 10875_2023_1472_MOESM1_ESM.pdf [file 10875_2023_1472_MOESM1_ESM.pdf]

Supplementary Information

## The GAIN registry – A new prospective study for patients with multi-organ autoimmunity and autoinflammation

Paulina Staus<sup>1,2</sup>, Stephan Rusch<sup>2</sup>, Sabine El-Helou<sup>2,3</sup>, Gabriele Müller<sup>2</sup>, Máté Krausz<sup>2,4,5</sup>, Ulf Geisen<sup>6</sup>, Andres Caballero Garcia de Oteyza<sup>2,3</sup>, Renate Krüger<sup>7</sup>, Shahrzad Bakhtiar<sup>8</sup>, Min Ae Lee-Kirsch<sup>9</sup>, Maria Fasshauer<sup>10</sup>, Ulrich Baumann<sup>11</sup>, Bimba Franziska Hoyer<sup>6</sup>, João Farela Neves<sup>12</sup>, Michael Borte<sup>10</sup>, Maria Carrabba<sup>13</sup>, Fabian Hauck<sup>14</sup>, Stephan Ehl<sup>2</sup>, Peter Bader<sup>8</sup>, Horst von Bernuth<sup>15,16,17</sup>, Faranaz Atschekzei<sup>3</sup>, Mikko R. J. Seppänen<sup>18†</sup>, Klaus Warnatz<sup>2,4</sup>, Alexandra Nieters<sup>2</sup>, Gerhard Kindl<sup>2\*</sup>, Bodo Grimbacher<sup>2,4,19,20,21\*</sup>

\* These authors contributed equally to this work.

† On behalf of the ESID registry working party <https://esid.org/Working-Parties/Registry-Working-Party>

<sup>1</sup> Institute of Medical Biometry and Statistics, Division Methods in Clinical Epidemiology, Faculty of Medicine and Medical Center - University of Freiburg, Freiburg, Germany.

<sup>2</sup> Institute for Immunodeficiency, Center for Chronic Immunodeficiency (CCI), Faculty of Medicine, Medical Center - University of Freiburg, Freiburg, Germany.

<sup>3</sup> Department of Rheumatology and Immunology, Hannover Medical School, Hanover, Germany. Hannover Medical School, Cluster of Excellence RESIST (EXC 2155), Hanover, Germany.

<sup>4</sup> Department of Rheumatology and Clinical Immunology, Medical Center - University of Freiburg, Faculty of Medicine, University of Freiburg, Freiburg, Germany.

<sup>5</sup> Faculty of Biology, Albert-Ludwigs-University of Freiburg, Germany.

<sup>6</sup> Excellence Center for Inflammation Medicine, Clinic for Rheumatology and Clinical Immunology, University Hospital Schleswig-Holstein, Campus Kiel, Kiel, Germany.

<sup>7</sup> Department of Pediatric Respiratory Medicine, Immunology and Critical Care Medicine, Charité - Universitätsmedizin Berlin, Berlin, Germany.

<sup>8</sup> Division for Stem Cell Transplantation, Immunology and Intensive Care Medicine, Hospital for Children and Adolescents, University Hospital, Goethe University, Frankfurt am Main, Germany.

<sup>9</sup> Department of Pediatrics, University Hospital and Medical Faculty Carl Gustav-Carus, Technische Universität Dresden, Dresden, Germany.

<sup>10</sup> Hospital for Children & Adolescents, St. Georg Hospital, Leipzig, Germany; Academic Teaching Hospital of the University of Leipzig, Immunodeficiency Center Leipzig (IDCL), Leipzig, Germany.

<sup>11</sup> Department of Paediatric Pulmonology, Allergy and Neonatology, Hannover Medical School, Hannover, Germany.

<sup>12</sup> Primary Immunodeficiencies Unit, Hospital Dona Estefânia, Centro Hospitalar de Lisboa Central, EPE, Lisbon, Portugal; CEDOC, Chronic Diseases Research Center, NOVA Medical School, Lisboa, Portugal.

<sup>13</sup> Dipartimento di Medicina Interna, Fondazione IRCCS Ca' Granda Ospedale Maggiore Policlinico, UOS Malattie Rare, Milano, Italy.

<sup>14</sup> Department of Pediatrics, Dr von Hauner Children's Hospital, University Hospital, Ludwig Maximilians Universität München, Munich, Germany.

<sup>15</sup> Berlin Institute of Health at Charité – Universitätsmedizin Berlin, Berlin, Germany.

<sup>16</sup> Labor Berlin GmbH, Department of Immunology, Berlin, Germany.

<sup>17</sup> Charité - Universitätsmedizin Berlin, corporate member of Freie Universität Berlin, Humboldt-Universität zu Berlin, and Berlin Institute of Health (BIH), Berlin-Brandenburg Center for Regenerative Therapies (BCRT), Berlin, Germany.

<sup>18</sup> The Rare Disease and Pediatric Research Centers, Hospital for Children and Adolescents and Adult Immunodeficiency Unit, Inflammation Center, University of Helsinki and HUS Helsinki, University Hospital, Helsinki, Finland.

<sup>19</sup> DZIF - German Center for Infection Research, Satellite Center Freiburg, Freiburg, Germany.

<sup>20</sup> CIBSS – Centre for Integrative Biological Signalling Studies, Albert-Ludwigs University, Freiburg, Germany.

<sup>21</sup> RESIST- Cluster of Excellence 2155 to Hanover Medical School, Satellite Center Freiburg, Freiburg, Germany.

**Correspondence:**

Prof. Dr. Bodo Grimbacher  
Breisacher Str. 115, 79106 Freiburg, Germany  
Tel +49 761 270-77732  
Fax +49 761 270-77744  
Email [bodo.grimbacher@uniklinik-freiburg.de](mailto:bodo.grimbacher@uniklinik-freiburg.de)

**Table S1 Centers participating in the GAIN registry and the corresponding number of patients registered**

| <b>Name of the participating center</b>                                                               | <b>Number of registered patients</b> |
|-------------------------------------------------------------------------------------------------------|--------------------------------------|
| Center for Chronic Immunodeficiency, Adult Ambulance, University Hospital Freiburg; Freiburg; Germany | 203                                  |

|                                                                                                                                                                                   |    |
|-----------------------------------------------------------------------------------------------------------------------------------------------------------------------------------|----|
| Department for Clinical Rheumatology and Immunology,<br>Hannover Medical School; Hannover; Germany.                                                                               | 85 |
| Department of Pediatric Respiratory Medicine, Immunology<br>and Critical Care Medicine, Charité - Universitätsmedizin<br>Berlin; Berlin; Germany                                  | 56 |
| Centre for Children's and Youth Medicine, Division of Stem<br>Cell Transplantation, Immunology and Intensive Care<br>Medicine, University Hospital Frankfurt; Frankfurt; Germany  | 15 |
| Center for Chronic Immunodeficiency, Pediatric<br>Ambulance, University Hospital Freiburg; Freiburg;<br>Germany                                                                   | 12 |
| Dr. von Hauner'sches Children's Hospital, Ludwig-<br>Maximilians-University; Munich; Germany                                                                                      | 10 |
| Department of Pediatrics, University Hospital and Medical<br>Faculty Carl Gustav-Carus, Technische Universität<br>Dresden; Dresden; Germany                                       | 8  |
| Centro Immunodeficienze Primitive e Sindromi<br>Autoinfiammatorie, Department of Internal Medicine,<br>Fondazione IRCCS Ca' Granda Ospedale Maggiore<br>Policlinico; Milan; Italy | 7  |
| Children's hospital St. Georg; Leipzig; Germany                                                                                                                                   | 7  |
| Excellence Centre for Inflammation Medicine, Clinic for<br>Rheumatology and Clinical Immunology, University<br>Hospital Schleswig-Holstein, Campus Kiel; Kiel; Germany            | 7  |
| Department of Pediatric Pulmonology and Neonatology,<br>Hanover Medical School; Hannover; Germany                                                                                 | 6  |
| Hospital Dona Estefânia, Pediatric University Hospital,<br>Primary Immunodeficiencies Unit; Lisbon; Portugal                                                                      | 3  |
